# Supplementary material for: Modulating magnetic anisotropy in linear tetranuclear dysprosium(iii) complexes via coordinated anions
Source: Royal Society of Chemistry journal article supplement (doi:10.1039/d4dt01949k), 2024-01-01
Supplement: d4dt01949k1.pdf [file d4dt01949k1.pdf]

## SUPPORTING INFORMATION

### **Modulating Magnetic Anisotropy in Linear Tetranuclear Dysprosium(III) Complexes via Coordinated Anions.**

Guan-Lin Lu,<sup>a</sup> Shih-Ting Chiu,<sup>a</sup> Po-Heng Lin\*<sup>a</sup> and Jérôme Long\*<sup>c,d</sup>

*a. Department of Chemistry, National Chung Hsing University, Taichung 402, Taiwan. E-mail: poheng@dragon.nchu.edu.tw*

*b. ICGM, Univ. Montpellier, CNRS, ENSCM, Montpellier, France. E-mail: jerome.long@umontpellier.fr*

*c. Institut Universitaire de France (IUF), 1 rue Descartes, 75231 Paris Cedex 05, France.*

## TABLE OF CONTENTS

|                                                                                                                                                                                                                         |    |
|-------------------------------------------------------------------------------------------------------------------------------------------------------------------------------------------------------------------------|----|
| Figure S1: Views of the packing arrangements for complexes 1 and 2 along the $b$ crystallographic axis. The hydrogen atoms have been omitted for clarity.....                                                           | 3  |
| Figure S2: Frequency dependence of $\chi'$ and $\chi''$ for 1 and 2 for various dc fields at 2 K.....                                                                                                                   | 4  |
| Figure S3: Field dependence of the relaxation time for 1 and 2 at 2 K. Line is a guide for eyes...4                                                                                                                     | 4  |
| Figure S4: Cole-Cole (Argand) plots obtained using the ac susceptibility data for 2 under a 500 Oe field.....                                                                                                           | 5  |
| Figure S5: Frequency dependence of the out-of phase ( $\chi''$ ) susceptibilities for 1 under a 500 Oe dc-field.....                                                                                                    | 5  |
| Figure S6 : Anisotropic axes ( $g_z$ purple) obtained from <i>ab initio</i> calculations for 1 and 2. For Dy1 in 1, the $g_x$ and $g_y$ are shown in green and blue.....                                                | 6  |
| Table S1: Crystal data, data collection and structure refinement details for 1-2.....                                                                                                                                   | 7  |
| Table S3: Fitting of the Cole-Cole plots with a generalized Debye model under a 500 Oe dc field for 2.....                                                                                                              | 8  |
| Table S4: <i>Ab initio</i> calculated energies, $g$ -tensor main values of the ground doublet and the $n^{\text{th}}$ KD doublet for the ground multiplet $J = 15/2$ obtained for the individual fragment Dy1 in 1..... | 8  |
| Table S5: <i>Ab initio</i> calculated energies, $g$ -tensor main values of the ground doublet and the $n^{\text{th}}$ KD doublet for the ground multiplet $J = 15/2$ obtained for the individual fragment Dy2 in 1..... | 9  |
| Table S6: <i>Ab initio</i> calculated energies, $g$ -tensor main values of the ground doublet and the $n^{\text{th}}$ KD doublet for the ground multiplet $J = 15/2$ obtained for the individual fragment Dy1 in 2..... | 9  |
| Table S7: <i>Ab initio</i> calculated energies, $g$ -tensor main values of the ground doublet and the $n^{\text{th}}$ KD doublet for the ground multiplet $J = 15/2$ obtained for the individual fragment Dy2 in 2..... | 9  |
| Table S8: Weight of individual crystal-field parameters on the crystal-field splitting Dy1 in 1. Only values larger than 1% are given.....                                                                              | 10 |
| Table S9: Weight of individual crystal-field parameters on the crystal-field splitting obtained for Dy1 in 2. Only values larger than 1% are given.....                                                                 | 10 |
| Table S10: Weight of individual crystal-field parameters on the crystal-field splitting obtained for Dy1 in 2 Only values larger than 1% are given.....                                                                 | 11 |
| Table S11: Weight of individual crystal-field parameters on the crystal-field splitting obtained for Dy2 in 2 Only values larger than 1% are given.....                                                                 | 12 |

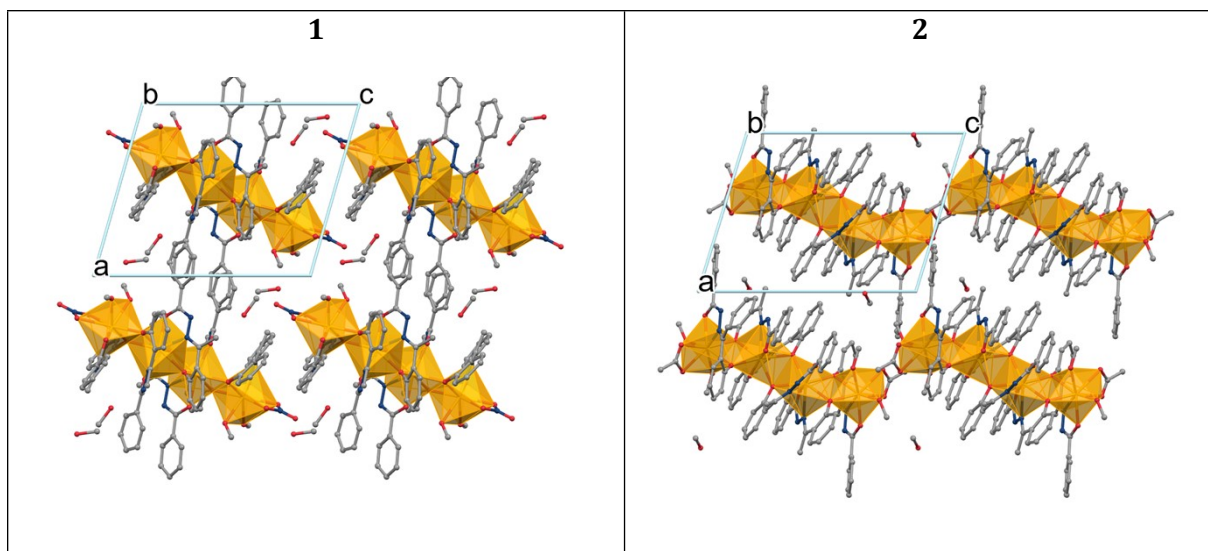

**Figure S1:** Views of the packing arrangements for complexes **1** and **2** along the *b* crystallographic axis. The hydrogen atoms have been omitted for clarity.

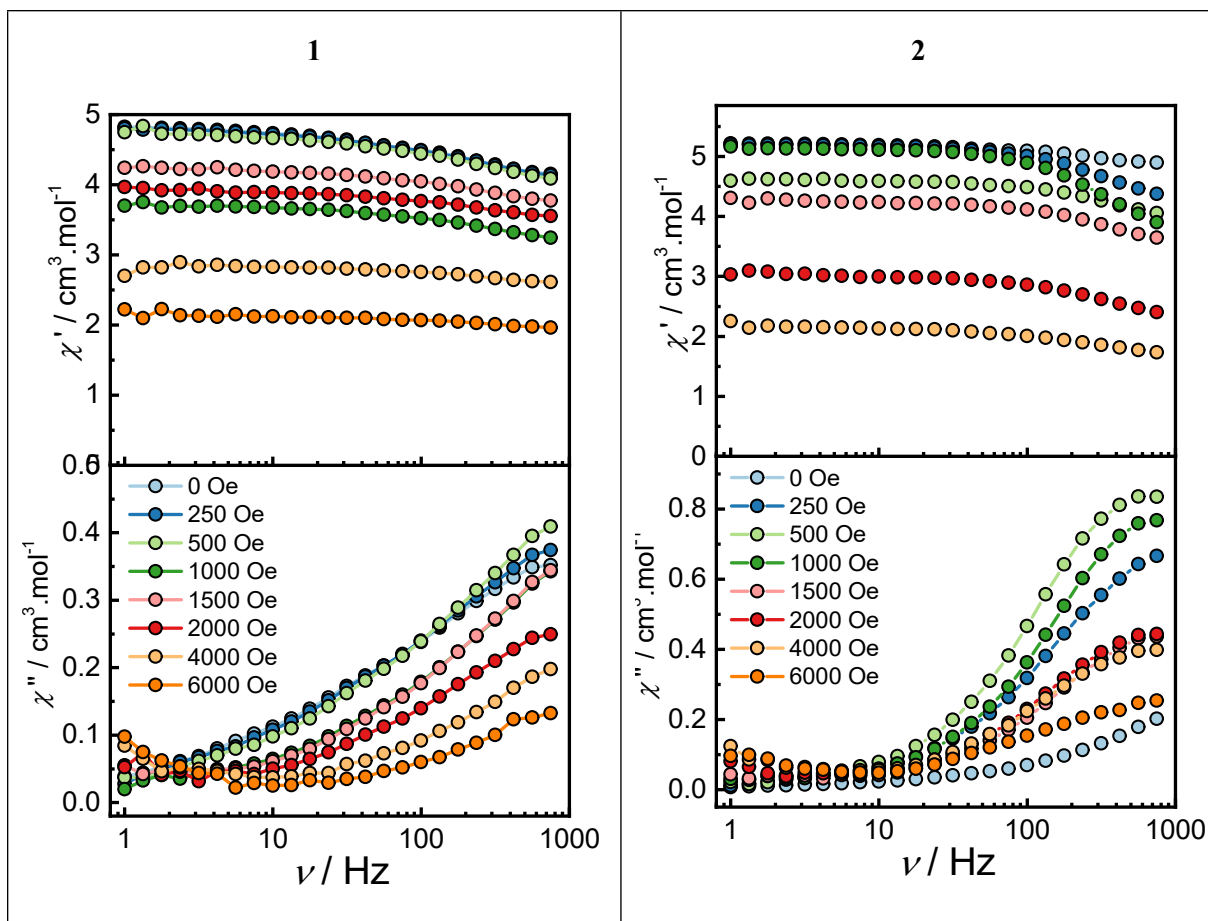

**Figure S2:** Frequency dependence of  $\chi'$  and  $\chi''$  for **1** and **2** for various dc fields at 2 K.

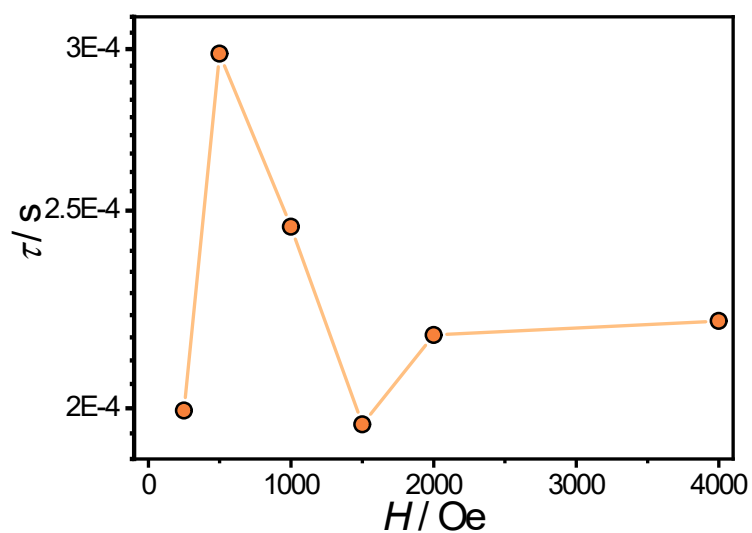

**Figure S3:** Field dependence of the relaxation time for **1** and **2** at 2 K. Line is a guide for eyes.

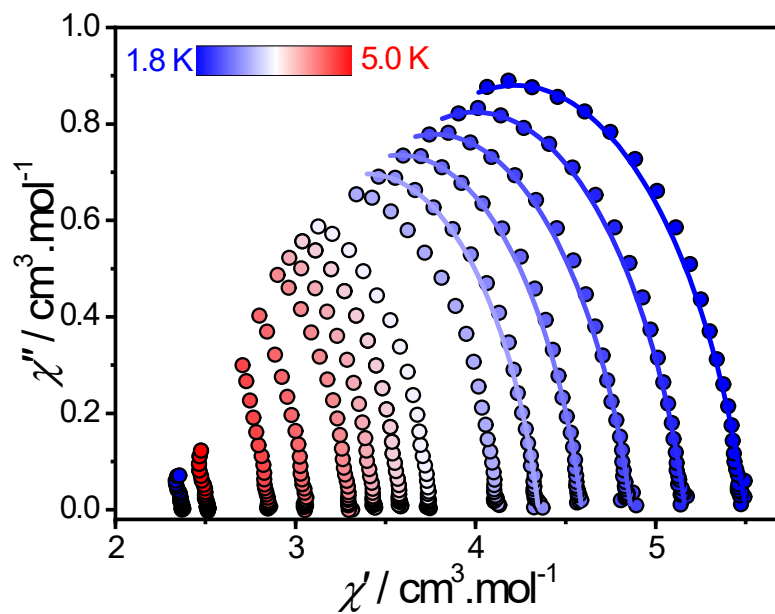

Figure S4: Cole-Cole (Argand) plots obtained using the ac susceptibility data for 2 under a 500 Oe field.

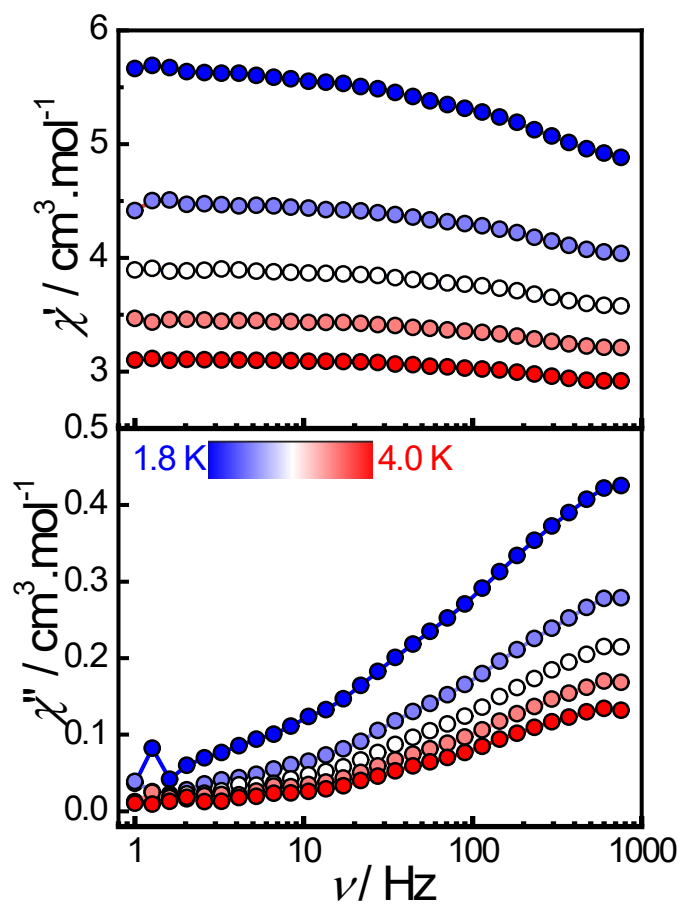

Figure S5: Frequency dependence of the out-of phase ( $\chi''$ ) susceptibilities for 1 under a 500 Oe dc-field.

**Table S1:** Crystal data, data collection and structure refinement details for 1-2.

|                                                | 1                                                                                | 2                                                                                 |
|------------------------------------------------|----------------------------------------------------------------------------------|-----------------------------------------------------------------------------------|
| Formula                                        | C <sub>98</sub> H <sub>106</sub> Dy <sub>4</sub> N <sub>14</sub> O <sub>26</sub> | C <sub>100</sub> H <sub>104</sub> Dy <sub>4</sub> N <sub>12</sub> O <sub>22</sub> |
| <i>M</i>                                       | 2545.96                                                                          | 2475.95                                                                           |
| <i>T</i> , K                                   | 150.15 K                                                                         | 150.15 K                                                                          |
| Crystal system                                 | Triclinic                                                                        | Triclinic                                                                         |
| Space group                                    | <i>P</i> $\bar{1}$                                                               | <i>P</i> $\bar{1}$                                                                |
| <i>Z</i> ( <i>Z'</i> )                         | 1                                                                                | 1                                                                                 |
| <i>a</i> , Å                                   | 13.8482(6)                                                                       | 13.1922(8)                                                                        |
| <i>b</i> , Å                                   | 14.9319(7)                                                                       | 14.1360(9)                                                                        |
| <i>c</i> , Å                                   | 14.9564(7)                                                                       | 15.6765(10)                                                                       |
| $\alpha$ , °                                   | 93.119(2)°                                                                       | 101.295(2)°                                                                       |
| $\beta$ , °                                    | 102.607(2)°                                                                      | 99.543(2)°                                                                        |
| $\gamma$ , °                                   | 117.440(2)°                                                                      | 117.467(2)°.                                                                      |
| <i>V</i> , Å <sup>3</sup>                      | 2635.3(2)                                                                        | 2430.9(3)                                                                         |
| <i>d</i> <sub>calcd</sub> , g.cm <sup>-3</sup> | 1.604                                                                            | 1.691                                                                             |
| $\mu$ , mm <sup>-1</sup>                       | 2.881                                                                            | 3.117                                                                             |
| <i>F</i> <sub>000</sub>                        | 1264                                                                             | 1228                                                                              |
| <i>wR</i> <sub>2</sub> (all data)              | 0.0433                                                                           | 0.0511                                                                            |
| <i>S</i> ( <i>F</i> <sup>2</sup> )             | 1.095                                                                            | 1.044                                                                             |

**Table S2:** SHAPE analysis for **1** and **2**.

|          |     | OP     | HPY    | HBPY   | CU     | SAPR         | TDD          | JGBF   | JETBPY | JBTPR | BTPR         | JSD   | TT     | ETBPY  |
|----------|-----|--------|--------|--------|--------|--------------|--------------|--------|--------|-------|--------------|-------|--------|--------|
| <b>1</b> | Dy1 | 31.470 | 21.671 | 16.080 | 9.920  | 1.874        | <b>1.214</b> | 15.949 | 28.006 | 3.045 | 2.161        | 4.423 | 10.313 | 24.224 |
|          | Dy2 | 34.187 | 22.134 | 16.724 | 9.805  | 2.735        | <b>1.657</b> | 15.678 | 28.296 | 3.945 | 2.934        | 4.784 | 10.554 | 23.932 |
| <b>2</b> | Dy1 | 33.511 | 21.253 | 15.23  | 9.937  | <b>1.318</b> | 2.101        | 16.268 | 27.007 | 3.086 | 2.253        | 5.236 | 10.774 | 23.149 |
|          | Dy2 | 31.121 | 20.100 | 12.921 | 10.293 | 3.291        | 3.185        | 11.612 | 24.804 | 3.689 | <b>2.985</b> | 5.084 | 11.069 | 20.184 |

OP: Octagon

HPY: Heptagonal pyramid

HBPY: Hexagonal bipyramid

CU: Cube

SAPR: Square antiprism

TDD: Triangular dodecahedron

JGBF: Johnson gyrobifastigium

JETBPY: Johnson elongated triangular bipyramid

JBTPR: Johnson biaugmented trigonal prism

BTPR: Biaugmented trigonal prism

JSD: Snub diphenooid J84

TT: Triakis tetrahedron

ETBPY: Elongated trigonal bipyramid

**Table S3:** Fitting of the Cole-Cole plots with a generalized Debye model under a 500 Oe dc field for **2**.

| $T$ (K) | $\chi_S$ (cm <sup>3</sup> . mol <sup>-1</sup> ) | $\chi_T$ (cm <sup>3</sup> . mol <sup>-1</sup> ) | $\alpha$ |
|---------|-------------------------------------------------|-------------------------------------------------|----------|
| 1.80003 | 8.81555                                         | 16.49864                                        | 0.23319  |
| 1.99998 | 8.48569                                         | 15.49298                                        | 0.21726  |
| 2.19988 | 8.03302                                         | 14.58852                                        | 0.21163  |
| 2.39999 | 7.70871                                         | 13.76918                                        | 0.19876  |
| 2.60016 | 7.35575                                         | 13.04703                                        | 0.1938   |

**Table S4:** *Ab initio* calculated energies,  $g$ -tensor main values of the ground doublet and the  $n^{\text{th}}$  KD doublet for the ground multiplet  $J = 15/2$  obtained for the individual fragment **Dy1** in **1**.

| KD       | Energy (cm <sup>-1</sup> ) | $g_x$      | $g_y$      | $g_z$      | Wavefunction (only component with > 20 % are given) |
|----------|----------------------------|------------|------------|------------|-----------------------------------------------------|
| <b>1</b> | 0                          | 10.5207026 | 9.34367039 | 1.62771667 | 43.8%   $\pm 3/2$ >>; 33.5%   $\pm 1/2$ >           |
| <b>2</b> | 14                         | 7.10525321 | 5.30881065 | 1.80895843 | 38.0%   $\pm 5/2$ >; 34.0%   $\pm 1/2$ >            |
| <b>3</b> | 45                         | 1.3922696  | 5.76276394 | 11.4865372 | 33.8 %   $\pm 7/2$ >; 24.2%   $\pm 5/2$ >           |
| <b>4</b> | 84                         | 8.47129535 | 7.3915465  | 3.15687154 | 35.4 %   $\pm 7/2$ >; 23.8 %   $\pm 9/2$ >          |
| <b>5</b> | 144                        | 1.36488508 | 3.78719637 | 12.3550548 | 37.4 %   $\pm 9/2$ >; 29.5 %   $\pm 11/2$ >         |
| <b>6</b> | 257                        | 2.70365051 | 5.72520814 | 9.43800796 | 27.1%   $\pm 13/2$ >; 25.2 %   $\pm 11/2$ >         |

|   |     |            |            |            |                      |
|---|-----|------------|------------|------------|----------------------|
| 7 | 305 | 1.80875076 | 6.80029146 | 12.0673329 | 31.1%   $\pm 11/2$ > |
| 8 | 493 | 0.0419435  | 0.09272241 | 19.4784586 | 82.7   $\pm 15/2$ >  |

**Table S5:** *Ab initio* calculated energies, g-tensor main values of the ground doublet and the  $n^{\text{th}}$  KD doublet for the ground multiplet  $J = 15/2$  obtained for the individual fragment **Dy2** in **1**.

| KD | Energy (cm <sup>-1</sup> ) | $g_x$      | $g_y$      | $g_z$      | Wavefunction (only component with > 20 % are given)            |
|----|----------------------------|------------|------------|------------|----------------------------------------------------------------|
| 1  | 0                          | 0.00162983 | 0.0171375  | 19.7318171 | 97.1 %   $\pm 15/2$ >>                                         |
| 2  | 66                         | 1.03706486 | 1.72228401 | 15.905214  | 86.4%   $\pm 13/2$ >                                           |
| 3  | 114                        | 1.71041302 | 3.53998884 | 13.8437617 | 22.8 %   $\pm 5/2$ >                                           |
| 4  | 160                        | 10.0906727 | 5.41666892 | 0.17424847 | 47.7 %   $\pm 11/2$ >                                          |
| 5  | 214                        | 3.37321391 | 5.89830627 | 10.4540394 | 34.5 %   $\pm 9/2$ >; 20.9 %   $\pm 11/2$ >                    |
| 6  | 302                        | 1.13128092 | 1.93976414 | 16.0474142 | 29.7%   $\pm 9/2$ >; 27.8 %   $\pm 7/2$ >                      |
| 7  | 435                        | 0.71890113 | 1.21749458 | 17.4542283 | 33.5%   $\pm 3/2$ >; 21.9 %   $\pm 5/2$ >; 20.7%   $\pm 1/2$ > |
| 8  | 475                        | 0.37322956 | 1.92185715 | 18.118985  | 26.0%   $\pm 5/2$ >; 23.1 %   $\pm 1/2$ >; 22.2%   $\pm 1/2$ > |

**Table S6:** *Ab initio* calculated energies, g-tensor main values of the ground doublet and the  $n^{\text{th}}$  KD doublet for the ground multiplet  $J = 15/2$  obtained for the individual fragment **Dy1** in **2**.

| KD | Energy (cm <sup>-1</sup> ) | $g_x$      | $g_y$      | $g_z$       | Wavefunction (only component with > 20 % are given)            |
|----|----------------------------|------------|------------|-------------|----------------------------------------------------------------|
| 1  | 0                          | 0.60016941 | 1.10377075 | 16.75342281 | 61.9%   $\pm 15/2$ >                                           |
| 2  | 29                         | 2.08632926 | 3.40394824 | 13.73168298 | 26.1%   $\pm 3/2$ >; 21.4%   $\pm 7/2$ >; 21.3%   $\pm 1/2$ >; |
| 3  | 48                         | 9.75597866 | 7.20354648 | 1.30051558  | 26.3 %   $\pm 9/2$ >;                                          |
| 4  | 84                         | 9.07173042 | 6.11402172 | 1.13390603  | 29.2 %   $\pm 13/2$ >; 24.0 %   $\pm 9/2$ >;                   |
| 5  | 153                        | 1.79118542 | 4.28130216 | 12.30925322 | No components > 20%                                            |
| 6  | 266                        | 2.32520653 | 3.58804312 | 12.28138672 | 20.1%   $\pm 7/2$ >;                                           |
| 7  | 317                        | 1.61863692 | 4.29257961 | 14.84762711 | 24.7%   $\pm 13/2$ >; 21.0%   $\pm 11/2$ >                     |



|   |     |           |            |             |                            |
|---|-----|-----------|------------|-------------|----------------------------|
| 8 | 439 | 0.0960058 | 0.22691975 | 19.25800192 | 37.0%  ±1/2>; 30.1%  ±3/2> |
|---|-----|-----------|------------|-------------|----------------------------|

**Table S7:** *Ab initio* calculated energies, g-tensor main values of the ground doublet and the n<sup>th</sup> KD doublet for the ground multiplet  $J = 15/2$  obtained for the individual fragment **Dy2** in **2**.

| KD | Energy (cm <sup>-1</sup> ) | $g_x$      | $g_y$      | $g_z$      | Wavefunction (only component with > 20 % are given) |
|----|----------------------------|------------|------------|------------|-----------------------------------------------------|
| 1  | 0                          | 0.03531591 | 0.06450346 | 19.6552356 | 97.0%  ±15/2>                                       |
| 2  | 116                        | 1.55272665 | 6.71466905 | 12.208662  | 47.6%  ±13/2>                                       |
| 3  | 147                        | 2.30861678 | 4.86349329 | 9.55702568 | 20.9 %  ±9/2>                                       |
| 4  | 218                        | 4.04923077 | 4.40300107 | 10.815582  | 24.7 %  ±7/2>; 21.4 %  ±13/2>                       |
| 5  | 269                        | 0.97201679 | 4.94903047 | 10.9284212 | 21.2 %  ±1/2>                                       |
| 6  | 316                        | 0.51350407 | 1.92928421 | 16.6053338 | 20.3%  ±5/2>;                                       |
| 7  | 355                        | 0.53631204 | 2.19662127 | 16.1295451 | 26.2%  ±9/2>; 21.3%  ±7/2>                          |
| 8  | 672                        | 0.01071432 | 0.01582752 | 19.8326802 | 33.7%  ±1/2>; 28.0%  ±3/2>                          |

**Table S8:** Weight of individual crystal-field parameters on the crystal-field splitting **Dy1** in **1**. Only values larger than 1% are given.

| $k$ | $q$ | $B_k^q$   | Weight in % |
|-----|-----|-----------|-------------|
| 2   | 0   | 1.94E+00  | 14.01       |
| 4   | -1  | 6.57E-03  | 8.59        |
| 4   | 3   | -6.51E-03 | 8.51        |
| 4   | 2   | 5.73E-03  | 7.50        |
| 2   | -2  | -9.10E-01 | 6.56        |

|   |    |           |      |
|---|----|-----------|------|
| 4 | 4  | -4.69E-03 | 6.13 |
| 4 | 0  | 3.68E-03  | 4.81 |
| 6 | -4 | -3.59E-05 | 4.40 |
| 6 | 6  | 3.17E-05  | 3.89 |
| 6 | 1  | 2.95E-05  | 3.62 |
| 2 | -1 | 5.01E-01  | 3.61 |
| 4 | -2 | 2.35E-03  | 3.08 |
| 6 | -5 | 2.43E-05  | 2.98 |
| 6 | 2  | 2.39E-05  | 2.94 |
| 4 | -3 | -1.65E-03 | 2.16 |
| 6 | -6 | 1.72E-05  | 2.10 |
| 4 | -4 | 1.50E-03  | 1.97 |
| 6 | -1 | 1.52E-05  | 1.86 |
| 6 | 5  | 1.27E-05  | 1.55 |
| 2 | 2  | -1.83E-01 | 1.32 |
| 4 | 1  | -9.04E-04 | 1.18 |
| 6 | 0  | 8.85E-06  | 1.09 |
| 6 | -2 | -8.27E-06 | 1.01 |

**Table S9:** Weight of individual crystal-field parameters on the crystal-field splitting obtained for **Dy1** in **2**. Only values larger than 1% are given.

| <i>k</i> | <i>q</i> | $B_k^q$   | <i>Weight in %</i> |
|----------|----------|-----------|--------------------|
| 2        | 0        | -1.93E+00 | 14.2164186         |
| 4        | -4       | 9.25E-03  | 12.3608476         |
| 2        | 2        | 9.88E-01  | 7.27444863         |
| 4        | -2       | 4.95E-03  | 6.61590483         |
| 4        | -1       | -4.67E-03 | 6.23500341         |

|   |    |           |            |
|---|----|-----------|------------|
| 2 | -1 | 8.02E-01  | 5.90489908 |
| 4 | 4  | -3.93E-03 | 5.25478747 |
| 4 | 3  | 3.26E-03  | 4.36076978 |
| 6 | -1 | 2.39E-05  | 2.99977576 |
| 4 | -3 | 2.22E-03  | 2.97077274 |
| 6 | 5  | -2.35E-05 | 2.94612635 |
| 4 | 2  | -2.16E-03 | 2.88635666 |
| 2 | -2 | 3.74E-01  | 2.75362726 |
| 6 | -4 | -1.84E-05 | 2.3085846  |
| 4 | 0  | -1.71E-03 | 2.28886999 |
| 6 | -3 | -1.83E-05 | 2.28819592 |
| 6 | 3  | -1.80E-05 | 2.25621055 |
| 6 | 0  | 1.68E-05  | 2.10688923 |
| 6 | -2 | -1.65E-05 | 2.06345088 |
| 6 | 1  | -1.45E-05 | 1.81871883 |
| 4 | 1  | 1.13E-03  | 1.51073449 |
| 6 | -6 | 9.21E-06  | 1.15482399 |

**Table S10:** Weight of individual crystal-field parameters on the crystal-field splitting obtained for Dy1 in 2 Only values larger than 1% are given.

| <i>k</i> | <i>q</i> | <i>B<sub>k<sup>q</sup></sub></i> | <i>Weight in %</i> |
|----------|----------|----------------------------------|--------------------|
| 2        | 2        | -5.34E+00                        | 12.46              |
| 4        | -1       | -3.89E-02                        | 7.33               |
| 4        | 0        | 3.75E-02                         | 7.08               |
| 6        | 5        | 9.03E-04                         | 6.41               |
| 4        | 1        | 3.15E-02                         | 5.95               |
| 6        | 1        | 8.01E-04                         | 5.68               |

|   |    |           |      |
|---|----|-----------|------|
| 4 | 2  | 2.95E-02  | 5.58 |
| 4 | 3  | -2.53E-02 | 4.77 |
| 6 | 6  | 5.97E-04  | 4.23 |
| 2 | -2 | -1.63E+00 | 3.80 |
| 2 | 1  | 1.46E+00  | 3.40 |
| 4 | -4 | 1.72E-02  | 3.25 |
| 6 | -4 | -4.24E-04 | 3.01 |
| 6 | -6 | -4.21E-04 | 2.99 |
| 4 | 4  | -1.42E-02 | 2.67 |
| 6 | 0  | 3.74E-04  | 2.65 |
| 6 | 4  | -3.74E-04 | 2.65 |
| 6 | -2 | -3.29E-04 | 2.34 |
| 2 | 0  | -9.73E-01 | 2.27 |
| 6 | 3  | -3.14E-04 | 2.23 |
| 6 | 2  | -2.51E-04 | 1.78 |
| 4 | -2 | -9.21E-03 | 1.74 |
| 6 | -1 | -1.61E-04 | 1.14 |

**Table S11:** Weight of individual crystal-field parameters on the crystal-field splitting obtained for Dy<sup>2+</sup> in **2** Only values larger than 1% are given.

| <i>k</i> | <i>q</i> | <i>B<sub>k<sup>q</sup></sub></i> | <i>Weight in %</i> |
|----------|----------|----------------------------------|--------------------|
| 2        | 2        | 6.67E+00                         | 14.06              |
| 2        | 0        | -4.59E+00                        | 9.68               |
| 4        | -4       | 4.49E-02                         | 7.66               |
| 4        | 3        | -3.73E-02                        | 6.36               |
| 4        | 4        | 3.66E-02                         | 6.23               |
| 6        | -1       | 8.54E-04                         | 5.47               |
| 6        | 1        | -8.05E-04                        | 5.15               |
| 6        | -5       | -6.98E-04                        | 4.47               |
| 6        | -6       | 6.84E-04                         | 4.38               |
| 6        | 6        | 5.08E-04                         | 3.26               |
| 6        | 4        | 5.01E-04                         | 3.21               |
| 4        | 2        | -1.84E-02                        | 3.13               |
| 2        | -1       | -1.43E+00                        | 3.01               |
| 6        | 0        | -4.35E-04                        | 2.79               |
| 4        | 0        | -1.47E-02                        | 2.51               |
| 4        | -3       | -1.40E-02                        | 2.39               |
| 6        | 3        | 3.47E-04                         | 2.22               |
| 6        | -2       | 3.21E-04                         | 2.05               |
| 6        | 2        | 3.12E-04                         | 2.00               |
| 4        | -1       | -1.09E-02                        | 1.85               |
| 4        | 1        | 9.57E-03                         | 1.63               |
| 2        | -2       | 5.48E-01                         | 1.15               |
